# Supplementary material
Source: ML conference proceedings conference paper supplement (https://proceedings.neurips.cc/paper_files/paper/2022/hash/64587794695be22545d91c838243fcf8-Abstract.html)
Supplement: Supplementary file 1 [file 64587794695be22545d91c838243fcf8-Supplemental-Conference.zip]

Archive with 292 entries (265 files):
- SUPPLEMENTARY/
- __MACOSX/._SUPPLEMENTARY
- SUPPLEMENTARY/.DS_Store
- __MACOSX/SUPPLEMENTARY/._.DS_Store
- SUPPLEMENTARY/Appendix.pdf
- __MACOSX/SUPPLEMENTARY/._Appendix.pdf
- SUPPLEMENTARY/instructions.md
- __MACOSX/SUPPLEMENTARY/._instructions.md
- SUPPLEMENTARY/src/
- __MACOSX/SUPPLEMENTARY/._src
- SUPPLEMENTARY/src/.DS_Store
- __MACOSX/SUPPLEMENTARY/src/._.DS_Store
- SUPPLEMENTARY/src/requirements.txt
- __MACOSX/SUPPLEMENTARY/src/._requirements.txt
- SUPPLEMENTARY/src/dat/
- __MACOSX/SUPPLEMENTARY/src/._dat
- SUPPLEMENTARY/src/setup.py
- __MACOSX/SUPPLEMENTARY/src/._setup.py
- SUPPLEMENTARY/src/scripts/
- __MACOSX/SUPPLEMENTARY/src/._scripts
- SUPPLEMENTARY/src/.idea/
- __MACOSX/SUPPLEMENTARY/src/._.idea
- SUPPLEMENTARY/src/relational_erm/
- __MACOSX/SUPPLEMENTARY/src/._relational_erm
- SUPPLEMENTARY/src/dat/.DS_Store
- __MACOSX/SUPPLEMENTARY/src/dat/._.DS_Store
- SUPPLEMENTARY/src/dat/wikipedia/
- __MACOSX/SUPPLEMENTARY/src/dat/._wikipedia
- SUPPLEMENTARY/src/dat/pokec/
- __MACOSX/SUPPLEMENTARY/src/dat/._pokec
- SUPPLEMENTARY/src/scripts/run_wikipedia_links.py
- __MACOSX/SUPPLEMENTARY/src/scripts/._run_wikipedia_links.py
- SUPPLEMENTARY/src/scripts/__init__.py
- __MACOSX/SUPPLEMENTARY/src/scripts/.___init__.py
- SUPPLEMENTARY/src/scripts/__pycache__/
- __MACOSX/SUPPLEMENTARY/src/scripts/.___pycache__
- SUPPLEMENTARY/src/scripts/dataset_logic.py
- __MACOSX/SUPPLEMENTARY/src/scripts/._dataset_logic.py
- SUPPLEMENTARY/src/scripts/helpers.py
- __MACOSX/SUPPLEMENTARY/src/scripts/._helpers.py
- SUPPLEMENTARY/src/.idea/inspectionProfiles/
- __MACOSX/SUPPLEMENTARY/src/.idea/._inspectionProfiles
- SUPPLEMENTARY/src/.idea/csv-plugin.xml
- __MACOSX/SUPPLEMENTARY/src/.idea/._csv-plugin.xml
- SUPPLEMENTARY/src/.idea/POKEC_EMBEDDINGS_V4.iml
- __MACOSX/SUPPLEMENTARY/src/.idea/._POKEC_EMBEDDINGS_V4.iml
- SUPPLEMENTARY/src/.idea/vcs.xml
- __MACOSX/SUPPLEMENTARY/src/.idea/._vcs.xml
- SUPPLEMENTARY/src/.idea/.gitignore
- __MACOSX/SUPPLEMENTARY/src/.idea/._.gitignore
- SUPPLEMENTARY/src/.idea/workspace.xml
- __MACOSX/SUPPLEMENTARY/src/.idea/._workspace.xml
- SUPPLEMENTARY/src/.idea/modules.xml
- __MACOSX/SUPPLEMENTARY/src/.idea/._modules.xml
- SUPPLEMENTARY/src/.idea/misc.xml
- __MACOSX/SUPPLEMENTARY/src/.idea/._misc.xml
- SUPPLEMENTARY/src/relational_erm/.DS_Store
- __MACOSX/SUPPLEMENTARY/src/relational_erm/._.DS_Store
- SUPPLEMENTARY/src/relational_erm/tensorflow_ops/
- __MACOSX/SUPPLEMENTARY/src/relational_erm/._tensorflow_ops
- SUPPLEMENTARY/src/relational_erm/dataset/
- __MACOSX/SUPPLEMENTARY/src/relational_erm/._dataset
- SUPPLEMENTARY/src/relational_erm/sampling/
- __MACOSX/SUPPLEMENTARY/src/relational_erm/._sampling
- SUPPLEMENTARY/src/relational_erm/rerm_model/
- __MACOSX/SUPPLEMENTARY/src/relational_erm/._rerm_model
- SUPPLEMENTARY/src/relational_erm/__init__.py
- __MACOSX/SUPPLEMENTARY/src/relational_erm/.___init__.py
- SUPPLEMENTARY/src/relational_erm/models/
- __MACOSX/SUPPLEMENTARY/src/relational_erm/._models
- SUPPLEMENTARY/src/relational_erm/__pycache__/
- __MACOSX/SUPPLEMENTARY/src/relational_erm/.___pycache__
- SUPPLEMENTARY/src/relational_erm/optimizers/
- __MACOSX/SUPPLEMENTARY/src/relational_erm/._optimizers
- SUPPLEMENTARY/src/relational_erm/graph_ops/
- __MACOSX/SUPPLEMENTARY/src/relational_erm/._graph_ops
- SUPPLEMENTARY/src/relational_erm/data_cleaning/
- __MACOSX/SUPPLEMENTARY/src/relational_erm/._data_cleaning
- SUPPLEMENTARY/src/dat/wikipedia/.DS_Store
- __MACOSX/SUPPLEMENTARY/src/dat/wikipedia/._.DS_Store
- SUPPLEMENTARY/src/dat/wikipedia/category_names.tsv
- __MACOSX/SUPPLEMENTARY/src/dat/wikipedia/._category_names.tsv
- SUPPLEMENTARY/src/dat/pokec/README.md
- __MACOSX/SUPPLEMENTARY/src/dat/pokec/._README.md
- SUPPLEMENTARY/src/dat/pokec/regional_subset/
- __MACOSX/SUPPLEMENTARY/src/dat/pokec/._regional_subset
- SUPPLEMENTARY/src/scripts/__pycache__/__init__.cpython-38.pyc
- __MACOSX/SUPPLEMENTARY/src/scripts/__pycache__/.___init__.cpython-38.pyc
- SUPPLEMENTARY/src/scripts/__pycache__/dataset_logic.cpython-38.pyc
- __MACOSX/SUPPLEMENTARY/src/scripts/__pycache__/._dataset_logic.cpython-38.pyc
- SUPPLEMENTARY/src/scripts/__pycache__/run_wikipedia_links.cpython-37.pyc
- __MACOSX/SUPPLEMENTARY/src/scripts/__pycache__/._run_wikipedia_links.cpython-37.pyc
- SUPPLEMENTARY/src/scripts/__pycache__/dataset_logic.cpython-37.pyc
- __MACOSX/SUPPLEMENTARY/src/scripts/__pycache__/._dataset_logic.cpython-37.pyc
- SUPPLEMENTARY/src/scripts/__pycache__/run_wikipedia_links.cpython-38.pyc
- __MACOSX/SUPPLEMENTARY/src/scripts/__pycache__/._run_wikipedia_links.cpython-38.pyc
- SUPPLEMENTARY/src/scripts/__pycache__/__init__.cpython-37.pyc
- __MACOSX/SUPPLEMENTARY/src/scripts/__pycache__/.___init__.cpython-37.pyc
- SUPPLEMENTARY/src/.idea/inspectionProfiles/profiles_settings.xml
- __MACOSX/SUPPLEMENTARY/src/.idea/inspectionProfiles/._profiles_settings.xml
- SUPPLEMENTARY/src/relational_erm/tensorflow_ops/array_ops.py
- __MACOSX/SUPPLEMENTARY/src/relational_erm/tensorflow_ops/._array_ops.py
- SUPPLEMENTARY/src/relational_erm/tensorflow_ops/biased_walk_dataset.cpp
- __MACOSX/SUPPLEMENTARY/src/relational_erm/tensorflow_ops/._biased_walk_dataset.cpp
- SUPPLEMENTARY/src/relational_erm/tensorflow_ops/_datasets_tensorflow.cpython-37m-darwin.so
- __MACOSX/SUPPLEMENTARY/src/relational_erm/tensorflow_ops/.__datasets_tensorflow.cpython-37m-darwin.so
- SUPPLEMENTARY/src/relational_erm/tensorflow_ops/.DS_Store
- __MACOSX/SUPPLEMENTARY/src/relational_erm/tensorflow_ops/._.DS_Store
- SUPPLEMENTARY/src/relational_erm/tensorflow_ops/induced_ego_sample.cpp
- __MACOSX/SUPPLEMENTARY/src/relational_erm/tensorflow_ops/._induced_ego_sample.cpp
- SUPPLEMENTARY/src/relational_erm/tensorflow_ops/random_walk_dataset.cpp
- __MACOSX/SUPPLEMENTARY/src/relational_erm/tensorflow_ops/._random_walk_dataset.cpp
- SUPPLEMENTARY/src/relational_erm/tensorflow_ops/p_sampling_dataset.cpp
- __MACOSX/SUPPLEMENTARY/src/relational_erm/tensorflow_ops/._p_sampling_dataset.cpp
- SUPPLEMENTARY/src/relational_erm/tensorflow_ops/__init__.py
- __MACOSX/SUPPLEMENTARY/src/relational_erm/tensorflow_ops/.___init__.py
- SUPPLEMENTARY/src/relational_erm/tensorflow_ops/__pycache__/
- __MACOSX/SUPPLEMENTARY/src/relational_erm/tensorflow_ops/.___pycache__
- SUPPLEMENTARY/src/relational_erm/tensorflow_ops/adapter_ops.py
- __MACOSX/SUPPLEMENTARY/src/relational_erm/tensorflow_ops/._adapter_ops.py
- SUPPLEMENTARY/src/relational_erm/tensorflow_ops/packed_to_sparse.cpp
- __MACOSX/SUPPLEMENTARY/src/relational_erm/tensorflow_ops/._packed_to_sparse.cpp
- SUPPLEMENTARY/src/relational_erm/tensorflow_ops/repeat.cpp
- __MACOSX/SUPPLEMENTARY/src/relational_erm/tensorflow_ops/._repeat.cpp
- SUPPLEMENTARY/src/relational_erm/tensorflow_ops/uniform_edge_dataset.cpp
- __MACOSX/SUPPLEMENTARY/src/relational_erm/tensorflow_ops/._uniform_edge_dataset.cpp
- SUPPLEMENTARY/src/relational_erm/tensorflow_ops/_adapters_tensorflow.cpython-37m-darwin.so
- __MACOSX/SUPPLEMENTARY/src/relational_erm/tensorflow_ops/.__adapters_tensorflow.cpython-37m-darwin.so
- SUPPLEMENTARY/src/relational_erm/tensorflow_ops/induced_subgraph.cpp
- __MACOSX/SUPPLEMENTARY/src/relational_erm/tensorflow_ops/._induced_subgraph.cpp
- SUPPLEMENTARY/src/relational_erm/tensorflow_ops/concatenate_slices.cpp
- __MACOSX/SUPPLEMENTARY/src/relational_erm/tensorflow_ops/._concatenate_slices.cpp
- SUPPLEMENTARY/src/relational_erm/tensorflow_ops/batch_length_to_segment.cpp
- __MACOSX/SUPPLEMENTARY/src/relational_erm/tensorflow_ops/._batch_length_to_segment.cpp
- SUPPLEMENTARY/src/relational_erm/tensorflow_ops/_array_ops_tensorflow.cpython-37m-darwin.so
- __MACOSX/SUPPLEMENTARY/src/relational_erm/tensorflow_ops/.__array_ops_tensorflow.cpython-37m-darwin.so
- SUPPLEMENTARY/src/relational_erm/tensorflow_ops/adjacency_to_edge_list.cpp
- __MACOSX/SUPPLEMENTARY/src/relational_erm/tensorflow_ops/._adjacency_to_edge_list.cpp
- SUPPLEMENTARY/src/relational_erm/tensorflow_ops/dataset_ops.py
- __MACOSX/SUPPLEMENTARY/src/relational_erm/tensorflow_ops/._dataset_ops.py
- SUPPLEMENTARY/src/relational_erm/dataset/__init__.py
- __MACOSX/SUPPLEMENTARY/src/relational_erm/dataset/.___init__.py
- SUPPLEMENTARY/src/relational_erm/dataset/__pycache__/
- __MACOSX/SUPPLEMENTARY/src/relational_erm/dataset/.___pycache__
- SUPPLEMENTARY/src/relational_erm/dataset/dataset.py
- __MACOSX/SUPPLEMENTARY/src/relational_erm/dataset/._dataset.py
- SUPPLEMENTARY/src/relational_erm/dataset/wikipedia_dataset.py
- __MACOSX/SUPPLEMENTARY/src/relational_erm/dataset/._wikipedia_dataset.py
- SUPPLEMENTARY/src/relational_erm/sampling/negative_sampling.py
- __MACOSX/SUPPLEMENTARY/src/relational_erm/sampling/._negative_sampling.py
- SUPPLEMENTARY/src/relational_erm/sampling/.DS_Store
- __MACOSX/SUPPLEMENTARY/src/relational_erm/sampling/._.DS_Store
- SUPPLEMENTARY/src/relational_erm/sampling/__init__.py
- __MACOSX/SUPPLEMENTARY/src/relational_erm/sampling/.___init__.py
- SUPPLEMENTARY/src/relational_erm/sampling/factories.py
- __MACOSX/SUPPLEMENTARY/src/relational_erm/sampling/._factories.py
- SUPPLEMENTARY/src/relational_erm/sampling/__pycache__/
- __MACOSX/SUPPLEMENTARY/src/relational_erm/sampling/.___pycache__
- SUPPLEMENTARY/src/relational_erm/sampling/sampling.h
- __MACOSX/SUPPLEMENTARY/src/relational_erm/sampling/._sampling.h
- SUPPLEMENTARY/src/relational_erm/sampling/adapters.py
- __MACOSX/SUPPLEMENTARY/src/relational_erm/sampling/._adapters.py
- SUPPLEMENTARY/src/relational_erm/rerm_model/keras_model2.py
- __MACOSX/SUPPLEMENTARY/src/relational_erm/rerm_model/._keras_model2.py
- SUPPLEMENTARY/src/relational_erm/rerm_model/__init__.py
- __MACOSX/SUPPLEMENTARY/src/relational_erm/rerm_model/.___init__.py
- SUPPLEMENTARY/src/relational_erm/rerm_model/__pycache__/
- __MACOSX/SUPPLEMENTARY/src/relational_erm/rerm_model/.___pycache__
- SUPPLEMENTARY/src/relational_erm/rerm_model/wikipedia_contagion_estimation.py
- __MACOSX/SUPPLEMENTARY/src/relational_erm/rerm_model/._wikipedia_contagion_estimation.py
- SUPPLEMENTARY/src/relational_erm/rerm_model/contagion_estimation.py
- __MACOSX/SUPPLEMENTARY/src/relational_erm/rerm_model/._contagion_estimation.py
- SUPPLEMENTARY/src/relational_erm/rerm_model/helpers.py
- __MACOSX/SUPPLEMENTARY/src/relational_erm/rerm_model/._helpers.py
- SUPPLEMENTARY/src/relational_erm/rerm_model/wikipedia_keras_model.py
- __MACOSX/SUPPLEMENTARY/src/relational_erm/rerm_model/._wikipedia_keras_model.py
- SUPPLEMENTARY/src/relational_erm/rerm_model/keras_model.py
- __MACOSX/SUPPLEMENTARY/src/relational_erm/rerm_model/._keras_model.py
- SUPPLEMENTARY/src/relational_erm/models/metrics.py
- __MACOSX/SUPPLEMENTARY/src/relational_erm/models/._metrics.py
- SUPPLEMENTARY/src/relational_erm/models/multilabel_node_classification_template.py
- __MACOSX/SUPPLEMENTARY/src/relational_erm/models/._multilabel_node_classification_template.py
- SUPPLEMENTARY/src/relational_erm/models/__init__.py
- __MACOSX/SUPPLEMENTARY/src/relational_erm/models/.___init__.py
- SUPPLEMENTARY/src/relational_erm/models/__pycache__/
- __MACOSX/SUPPLEMENTARY/src/relational_erm/models/.___pycache__
- SUPPLEMENTARY/src/relational_erm/models/label_clustering.py
- __MACOSX/SUPPLEMENTARY/src/relational_erm/models/._label_clustering.py
- SUPPLEMENTARY/src/relational_erm/models/skipgram.py
- __MACOSX/SUPPLEMENTARY/src/relational_erm/models/._skipgram.py
- SUPPLEMENTARY/src/relational_erm/__pycache__/__init__.cpython-37.pyc
- __MACOSX/SUPPLEMENTARY/src/relational_erm/__pycache__/.___init__.cpython-37.pyc
- SUPPLEMENTARY/src/relational_erm/optimizers/__init__.py
- __MACOSX/SUPPLEMENTARY/src/relational_erm/optimizers/.___init__.py
- SUPPLEMENTARY/src/relational_erm/graph_ops/__init__.py
- __MACOSX/SUPPLEMENTARY/src/relational_erm/graph_ops/.___init__.py
- SUPPLEMENTARY/src/relational_erm/graph_ops/__pycache__/
- __MACOSX/SUPPLEMENTARY/src/relational_erm/graph_ops/.___pycache__
- SUPPLEMENTARY/src/relational_erm/graph_ops/tensorflow.py
- __MACOSX/SUPPLEMENTARY/src/relational_erm/graph_ops/._tensorflow.py
- SUPPLEMENTARY/src/relational_erm/graph_ops/structure.py
- __MACOSX/SUPPLEMENTARY/src/relational_erm/graph_ops/._structure.py
- SUPPLEMENTARY/src/relational_erm/graph_ops/representations.py
- __MACOSX/SUPPLEMENTARY/src/relational_erm/graph_ops/._representations.py
- SUPPLEMENTARY/src/relational_erm/data_cleaning/simulate_baseline_sbm.py
- __MACOSX/SUPPLEMENTARY/src/relational_erm/data_cleaning/._simulate_baseline_sbm.py
- SUPPLEMENTARY/src/relational_erm/data_cleaning/.DS_Store
- __MACOSX/SUPPLEMENTARY/src/relational_erm/data_cleaning/._.DS_Store
- SUPPLEMENTARY/src/relational_erm/data_cleaning/Confidence_Intervals.py
- __MACOSX/SUPPLEMENTARY/src/relational_erm/data_cleaning/._Confidence_Intervals.py
- SUPPLEMENTARY/src/relational_erm/data_cleaning/__init__.py
- __MACOSX/SUPPLEMENTARY/src/relational_erm/data_cleaning/.___init__.py
- SUPPLEMENTARY/src/relational_erm/data_cleaning/__pycache__/
- __MACOSX/SUPPLEMENTARY/src/relational_erm/data_cleaning/.___pycache__
- SUPPLEMENTARY/src/relational_erm/data_cleaning/wikipedia_simulate_treatment_outcome.py
- __MACOSX/SUPPLEMENTARY/src/relational_erm/data_cleaning/._wikipedia_simulate_treatment_outcome.py
- SUPPLEMENTARY/src/relational_erm/data_cleaning/wikipedia.py
- __MACOSX/SUPPLEMENTARY/src/relational_erm/data_cleaning/._wikipedia.py
- SUPPLEMENTARY/src/relational_erm/data_cleaning/simulate_treatment_outcome.py
- __MACOSX/SUPPLEMENTARY/src/relational_erm/data_cleaning/._simulate_treatment_outcome.py
- SUPPLEMENTARY/src/relational_erm/data_cleaning/pokec.py
- __MACOSX/SUPPLEMENTARY/src/relational_erm/data_cleaning/._pokec.py
- SUPPLEMENTARY/src/dat/pokec/regional_subset/.DS_Store
- __MACOSX/SUPPLEMENTARY/src/dat/pokec/regional_subset/._.DS_Store
- SUPPLEMENTARY/src/dat/pokec/regional_subset/pokec_links_processed.npz
- __MACOSX/SUPPLEMENTARY/src/dat/pokec/regional_subset/._pokec_links_processed.npz
- SUPPLEMENTARY/src/dat/pokec/regional_subset/pokec_links.npz
- __MACOSX/SUPPLEMENTARY/src/dat/pokec/regional_subset/._pokec_links.npz
- SUPPLEMENTARY/src/dat/pokec/regional_subset/profiles.pkl
- __MACOSX/SUPPLEMENTARY/src/dat/pokec/regional_subset/._profiles.pkl
- SUPPLEMENTARY/src/relational_erm/tensorflow_ops/__pycache__/adapter_ops.cpython-37.pyc
- __MACOSX/SUPPLEMENTARY/src/relational_erm/tensorflow_ops/__pycache__/._adapter_ops.cpython-37.pyc
- SUPPLEMENTARY/src/relational_erm/tensorflow_ops/__pycache__/dataset_ops.cpython-37.pyc
- __MACOSX/SUPPLEMENTARY/src/relational_erm/tensorflow_ops/__pycache__/._dataset_ops.cpython-37.pyc
- SUPPLEMENTARY/src/relational_erm/tensorflow_ops/__pycache__/array_ops.cpython-37.pyc
- __MACOSX/SUPPLEMENTARY/src/relational_erm/tensorflow_ops/__pycache__/._array_ops.cpython-37.pyc
- SUPPLEMENTARY/src/relational_erm/tensorflow_ops/__pycache__/__init__.cpython-37.pyc
- __MACOSX/SUPPLEMENTARY/src/relational_erm/tensorflow_ops/__pycache__/.___init__.cpython-37.pyc
- SUPPLEMENTARY/src/relational_erm/dataset/__pycache__/dataset.cpython-37.pyc
- __MACOSX/SUPPLEMENTARY/src/relational_erm/dataset/__pycache__/._dataset.cpython-37.pyc
- SUPPLEMENTARY/src/relational_erm/dataset/__pycache__/__init__.cpython-37.pyc
- __MACOSX/SUPPLEMENTARY/src/relational_erm/dataset/__pycache__/.___init__.cpython-37.pyc
- SUPPLEMENTARY/src/relational_erm/sampling/__pycache__/adapters.cpython-37.pyc
- __MACOSX/SUPPLEMENTARY/src/relational_erm/sampling/__pycache__/._adapters.cpython-37.pyc
- SUPPLEMENTARY/src/relational_erm/sampling/__pycache__/negative_sampling.cpython-37.pyc
- __MACOSX/SUPPLEMENTARY/src/relational_erm/sampling/__pycache__/._negative_sampling.cpython-37.pyc
- SUPPLEMENTARY/src/relational_erm/sampling/__pycache__/__init__.cpython-37.pyc
- __MACOSX/SUPPLEMENTARY/src/relational_erm/sampling/__pycache__/.___init__.cpython-37.pyc
- SUPPLEMENTARY/src/relational_erm/sampling/__pycache__/factories.cpython-37.pyc
- __MACOSX/SUPPLEMENTARY/src/relational_erm/sampling/__pycache__/._factories.cpython-37.pyc
- SUPPLEMENTARY/src/relational_erm/rerm_model/__pycache__/wikipedia_keras_model.cpython-37.pyc
- __MACOSX/SUPPLEMENTARY/src/relational_erm/rerm_model/__pycache__/._wikipedia_keras_model.cpython-37.pyc
- SUPPLEMENTARY/src/relational_erm/rerm_model/__pycache__/contagion_estimation.cpython-37.pyc
- __MACOSX/SUPPLEMENTARY/src/relational_erm/rerm_model/__pycache__/._contagion_estimation.cpython-37.pyc
- SUPPLEMENTARY/src/relational_erm/rerm_model/__pycache__/wikipedia_contagion_estimation.cpython-37.pyc
- __MACOSX/SUPPLEMENTARY/src/relational_erm/rerm_model/__pycache__/._wikipedia_contagion_estimation.cpython-37.pyc
- SUPPLEMENTARY/src/relational_erm/rerm_model/__pycache__/keras_model.cpython-37.pyc
- __MACOSX/SUPPLEMENTARY/src/relational_erm/rerm_model/__pycache__/._keras_model.cpython-37.pyc
- SUPPLEMENTARY/src/relational_erm/rerm_model/__pycache__/keras_model2.cpython-37.pyc
- __MACOSX/SUPPLEMENTARY/src/relational_erm/rerm_model/__pycache__/._keras_model2.cpython-37.pyc
- SUPPLEMENTARY/src/relational_erm/rerm_model/__pycache__/helpers.cpython-37.pyc
- __MACOSX/SUPPLEMENTARY/src/relational_erm/rerm_model/__pycache__/._helpers.cpython-37.pyc
- SUPPLEMENTARY/src/relational_erm/rerm_model/__pycache__/__init__.cpython-37.pyc
- __MACOSX/SUPPLEMENTARY/src/relational_erm/rerm_model/__pycache__/.___init__.cpython-37.pyc
- SUPPLEMENTARY/src/relational_erm/models/__pycache__/metrics.cpython-37.pyc
- __MACOSX/SUPPLEMENTARY/src/relational_erm/models/__pycache__/._metrics.cpython-37.pyc
- SUPPLEMENTARY/src/relational_erm/models/__pycache__/multilabel_node_classification_template.cpython-37.pyc
- __MACOSX/SUPPLEMENTARY/src/relational_erm/models/__pycache__/._multilabel_node_classification_template.cpython-37.pyc
- SUPPLEMENTARY/src/relational_erm/models/__pycache__/skipgram.cpython-37.pyc
- __MACOSX/SUPPLEMENTARY/src/relational_erm/models/__pycache__/._skipgram.cpython-37.pyc
- SUPPLEMENTARY/src/relational_erm/models/__pycache__/__init__.cpython-37.pyc
- __MACOSX/SUPPLEMENTARY/src/relational_erm/models/__pycache__/.___init__.cpython-37.pyc
- SUPPLEMENTARY/src/relational_erm/models/__pycache__/label_clustering.cpython-37.pyc
- __MACOSX/SUPPLEMENTARY/src/relational_erm/models/__pycache__/._label_clustering.cpython-37.pyc
- SUPPLEMENTARY/src/relational_erm/graph_ops/__pycache__/representations.cpython-37.pyc
- __MACOSX/SUPPLEMENTARY/src/relational_erm/graph_ops/__pycache__/._representations.cpython-37.pyc
- SUPPLEMENTARY/src/relational_erm/graph_ops/__pycache__/__init__.cpython-37.pyc
- __MACOSX/SUPPLEMENTARY/src/relational_erm/graph_ops/__pycache__/.___init__.cpython-37.pyc
- SUPPLEMENTARY/src/relational_erm/data_cleaning/__pycache__/simulate_baseline_sbm.cpython-37.pyc
- __MACOSX/SUPPLEMENTARY/src/relational_erm/data_cleaning/__pycache__/._simulate_baseline_sbm.cpython-37.pyc
- SUPPLEMENTARY/src/relational_erm/data_cleaning/__pycache__/pokec.cpython-37.pyc
- __MACOSX/SUPPLEMENTARY/src/relational_erm/data_cleaning/__pycache__/._pokec.cpython-37.pyc
- SUPPLEMENTARY/src/relational_erm/data_cleaning/__pycache__/wikipedia.cpython-37.pyc
- __MACOSX/SUPPLEMENTARY/src/relational_erm/data_cleaning/__pycache__/._wikipedia.cpython-37.pyc
- SUPPLEMENTARY/src/relational_erm/data_cleaning/__pycache__/wikipedia_simulate_treatment_outcome.cpython-37.pyc
- __MACOSX/SUPPLEMENTARY/src/relational_erm/data_cleaning/__pycache__/._wikipedia_simulate_treatment_outcome.cpython-37.pyc
- SUPPLEMENTARY/src/relational_erm/data_cleaning/__pycache__/simulate_treatment_outcome.cpython-37.pyc
- __MACOSX/SUPPLEMENTARY/src/relational_erm/data_cleaning/__pycache__/._simulate_treatment_outcome.cpython-37.pyc
- SUPPLEMENTARY/src/relational_erm/data_cleaning/__pycache__/Confidence_Intervals.cpython-37.pyc
- __MACOSX/SUPPLEMENTARY/src/relational_erm/data_cleaning/__pycache__/._Confidence_Intervals.cpython-37.pyc
- SUPPLEMENTARY/src/relational_erm/data_cleaning/__pycache__/__init__.cpython-37.pyc
- __MACOSX/SUPPLEMENTARY/src/relational_erm/data_cleaning/__pycache__/.___init__.cpython-37.pyc
