# Supplementary material
Source: ML conference proceedings conference paper supplement (https://proceedings.neurips.cc/paper_files/paper/2022/hash/64587794695be22545d91c838243fcf8-Abstract.html)
Supplement: Supplementary file 1 [file 64587794695be22545d91c838243fcf8-Supplemental-Conference.zip › SUPPLEMENTARY/src/dat/pokec/README.md]

Preprocessed Pokec data. Format as expected for relational ERM. See relational_erm/dataset/dataset.py.

A useful helper function for loading the data is load_data_pokec() in src/relational_ERM/data_cleaning/pokec

Raw data from https://snap.stanford.edu/data/soc-Pokec.html
