# Supplementary material
Source: ML conference proceedings conference paper supplement (https://proceedings.neurips.cc/paper_files/paper/2022/hash/64587794695be22545d91c838243fcf8-Abstract.html)
Supplement: Supplementary file 1 [file 64587794695be22545d91c838243fcf8-Supplemental-Conference.zip › SUPPLEMENTARY/src/dat/wikipedia/category_names.tsv]

Buprestoidea
People_from_Worcester
Skin_conditions_resulting_from_physical_factors
Visual_kei_bands
Japanese_rock_music_groups
Laboulbeniomycetes
Eye_anatomy
Nervous_system
Head_and_neck
Arteries_of_the_head_and_neck
Muscles_of_the_head_and_neck
Bones_of_the_head_and_neck
Skeletal_system
Euphorbia
Flora_of_Madagascar
EC_2.3.1
EC_3.5.1
NADPH-dependent_enzymes
Enzymes_of_unknown_structure
NADH-dependent_enzymes
EC_1.1.1
Flavin_enzymes
EC_2.1.1
EC_2.7.1
Enzymes_of_known_structure
EC_2.4.1
Blood_tests
Cerebrum
Neuroanatomy
Neurophysiology
Histology
Reproduction
RNA
Anatomy
History_of_medicine
Bacteriology
Neurological_disorders
Neurology
Metabolism
Microbiology
Membrane_biology
Proteins
Cell_biology
Enzymes
DNA
Molecular_biology
Genetics
Biotechnology
Immune_system
Immunology
Human_cells
Laboratory_techniques
Biochemistry
Developmental_biology
Biology
Autosomal_recessive_disorders
Aromatic_compounds
Hepatology
Digestive_system
Pediatrics
Stereochemistry
Toxicology
Reagents_for_organic_chemistry
Functional_groups
Organic_chemistry
Chemical_reactions
Chlorides
Chemical_bonding
Physical_chemistry
Metal_halides
Potassium_compounds
Oxidizing_agents
IARC_Group_2B_carcinogens
Chemical_processes
Food_additives
Fatty_acids
Sodium_compounds
Antiseptics
Sequenced_genomes
Medical_treatments
Dietary_supplements
Greek_loanwords
Physiology
Carboxylic_acids
Medical_Subject_Headings
Diseases_and_disorders
Alkenes
Nutrition
Food_science
Alkaloids
Pharmacology
Organochlorides
Lactams
Amines
Rare_diseases
Syndromes
World_Health_Organization_essential_medicines
Bacterial_diseases
Medical_emergencies
Autoimmune_diseases
Inflammations
Medical_terms
Eli_Lilly_and_Company
Medical_signs
Ketones
Alcohols
Biomolecules
Dermal_and_subcutaneous_growths
Skin_conditions_resulting_from_errors_in_metabolism
Virus-related_cutaneous_conditions
Genodermatoses
Tuberculosis
Integral_membrane_proteins
Signal_transduction
Peripheral_membrane_proteins
Protein_domains
Protein_families
Human_proteins
Cardiology
Cytokines
Aldehydes
Organic_reactions
Proteobacteria
Diabetes
Diseases_of_the_eye_and_adnexa
Embryology
Medical_equipment
Carbamates
Phenol_ethers
Gene_expression
Molecular_genetics
Viral_diseases
Animal_virology
Medical_tests
Name_reactions
Bacteria
Quaternary_ammonium_compounds
Disability
Anilines
Organophosphates
ATC_codes
Amino_acids
Epidemiology
Chemical_engineering
Protein_structure
Genomics
Neuroscience
Virology
Congenital_disorders
Death
Mu-opioid_agonists
Piperidines
Ethers
Acetate_esters
Phenols
Peptides
Obstetrics
Health
Lactones
Transcription_factors
American_biologists
Molecular_biologists
American_geneticists
Nobel_laureates_in_Physiology_or_Medicine
HIV/AIDS
Pyrimidines
Nitriles
Piperazines
Pyridines
Organofluorides
Ureas
Amides
Biochemistry_methods
Drugs
Antibiotics
Flavors
Reflexes
Clusters_of_differentiation
Genes
Animal_diseases
Surgery
Oncology
Carboxylate_esters
Medical_research
Abdomen
Veins_of_the_torso
Public_health
Polymers
Plastics
Packaging
Oxides
Organobromides
People_from_Winston-Salem,_North_Carolina
Abnormal_psychology
Companies_of_the_Netherlands
German_brands
Manufacturing_companies_of_Germany
Companies_of_Germany
Agricultural_pest_insects
Chrysomelidae
Chemical_elements
Nuclear_technology
Fluorides
Radioactivity
Nuclear_physics
Lists_of_isotopes_by_element
World_War_II_Desert_Airfields
Radar_stations_of_the_United_States_Air_Force
Aerospace_Defense_Command
SAGE_sites
Closed_facilities_of_the_United_States_Air_Force
Radar_networks
Radar_squadrons_of_the_United_States_Air_Force
United_States_Air_Force_airmen
Facilities_of_the_United_States_Air_National_Guard
World_War_II_strategic_bombing
Air_refueling_squadrons_of_the_United_States_Air_Force
Bombardment_squadrons_of_the_United_States_Air_Force
Strategic_Air_Command
Military_units_and_formations_of_the_United_States_in_World_War_II
Groups_of_the_United_States_Army_Air_Forces
Military_units_and_formations_of_the_United_States_Air_National_Guard
Bases_of_the_United_States_Air_Force
Fighter_squadrons_of_the_United_States_Air_Force
Airlift_squadrons_of_the_United_States_Air_Force
Military_units_and_formations_in_California
Military_history_of_the_United_States_(19001999)
Cold_War
United_States_Air_Force
American_World_War_II_flying_aces
Recipients_of_the_Air_Medal
Recipients_of_the_Distinguished_Flying_Cross_(United_States)
American_military_personnel_of_the_Vietnam_War
Recipients_of_the_Distinguished_Service_Medal_(United_States)
Recipients_of_the_Legion_of_Merit
United_States_Air_Force_generals
United_States_Air_Force_Academy_alumni
United_States_Army_Air_Forces_pilots_of_World_War_II
United_States_Army_Air_Forces_officers
John_F._Kennedy_School_of_Government_alumni
American_military_personnel_from_Wisconsin
United_States_Air_Force_officers
American_aviators
G_protein_coupled_receptors
American_surgeons
Laboratory_equipment
Economic_geology
Petrology
Aluminium_minerals
Calcium_minerals
Mineralogy
Sodium_minerals
Magnesium_minerals
Iron_minerals
Monoclinic_minerals
Orthorhombic_minerals
Oxide_minerals
Copper_minerals
Phosphate_minerals
Gemstones
Crystallography
Geology
Structural_geology
Historical_geology
Plate_tectonics
Geophysics
Earth_sciences
Physiographic_provinces
Constitutions_by_country
Rebels
Members_of_the_National_Assembly_of_Kenya
Orange_Democratic_Movement_politicians
19th-century_Christian_saints
Districts_of_Uganda
Populated_places_in_Uganda
Kampala_District
Cities_in_the_Great_Rift_Valley
Central_Region,_Uganda
Makerere_University_alumni
Government_ministers_of_Uganda
Members_of_the_Parliament_of_Uganda
Abraham_Lincoln
People_from_Springfield,_Illinois
Ophthalmology
Serotonin_receptor_agonists
Amphetamines
Thioethers
Indoles
Harvestmen
People_in_alternative_medicine
Traditional_Chinese_medicine
Phobias
Combination_drugs
Microbreweries
Beer_and_breweries_in_England
Businesspeople_in_the_brewing_industry
Romanian_people_of_Hungarian_descent
Expatriate_footballers_in_Romania
Romanian_football_managers
FC_Braov_players
FC_Oelul_Galai_players
CFM_U_Cluj_players
FC_Universitatea_Craiova_players
Liga_II_clubs
Romanian_football_clubs
Liga_I_players
Romanian_expatriate_footballers
Romanian_footballers
Romania_international_footballers
FC_Steaua_Bucureti_players
FC_Dinamo_Bucureti_players
FC_Rapid_Bucureti_players
FC_Politehnica_Timioara_players
FC_CFR_Cluj_players
Football_venues_in_Romania
Energy_conversion
Cooling_technology
Heating,_ventilating,_and_air_conditioning
Energy_economics
Climate_change_policy
Climate_change_organizations
Civil_parishes_in_Hertfordshire
Villages_in_Hertfordshire
Railway_stations_opened_in_1893
Locomotive_parts
Locomotives_by_wheel_arrangement
Deutsche_Reichsbahn-Gesellschaft_locomotives
Clothing_retailers_of_the_United_Kingdom
Retail_companies_of_the_United_Kingdom
Privately_held_companies_of_the_United_Kingdom
Places_in_Leeds
Villages_in_West_Yorkshire
British_brands
Lepidopterists
Hymenopterists
English_entomologists
English_ornithologists
Fellows_of_the_Zoological_Society_of_London
Muscidae
Hats
Headgear
Military_uniforms
Woven_fabrics
History_of_fashion
History_of_clothing_(Europe)
History_of_clothing_(Western_fashion)
2000s_fashion
1990s_fashion
1980s_fashion
Victorian_era
Edwardian_era
Pharmaceutical_companies_of_the_United_States
Biotechnology_companies
Companies_based_in_San_Diego,_California
Kangxi_radicals
Irish_MPs_17761783
Knights_of_St_Patrick
Irish_MPs_17611768
Irish_MPs_17271760
Earls_in_the_Peerage_of_Ireland
Irish_representative_peers
18th-century_Irish_people
Barons_in_the_Peerage_of_Ireland
Members_of_the_Parliament_of_Ireland_(pre-1801)
Butler_dynasty
Irish_judges
Irish_MPs_17981800
Irish_MPs_17901797
Constituencies_of_the_Parliament_of_Ireland_(pre-1801)
Members_of_the_Privy_Council_of_Ireland
Viscounts_in_the_Peerage_of_Ireland
19th-century_Irish_people
University_of_Illinois_alumni
American_biochemists
Science_and_engineering_awards
Wayne_State_University_faculty
American_awards
Acid_fast_bacilli
Nontuberculous_mycobacteria
Corynebacterineae
Population_genetics
Human_evolution
Apicomplexa
Plasmodium
Mosses
Volcanology
Mountains_of_Russia
Shield_volcanoes
Mountains_of_Alaska
Subduction_volcanoes
Stratovolcanoes
Active_volcanoes
Crater_lakes
Mountains_of_Indonesia
Mountains_of_Chile
Lists_of_volcanoes
Pleistocene_volcanoes
Volcanoes_of_British_Columbia
Northern_Cordilleran_Volcanic_Province
Extinct_volcanoes
Rustic_architecture
Ottoman_military_personnel_of_World_War_I
United_States_military_badges
Burkholderiales
Nanotechnology
Members_of_Academia_Europaea
Science_and_technology_in_Europe
American_dentists
University_of_Illinois_at_Chicago_faculty
Scottish_malt_whisky
Pseudomonadales
20th-century_classical_music
Villages_in_Kutno_County
Witchcraft
Sahaba
Arab_people
Tribes_of_Arabia
Islamic_organizations
History_of_Islam
Converts_to_Islam
Sharia
Islamic_terms
Arabic_words_and_phrases
Islamic_studies_scholars
Muslim_scholars_of_Islam
English_Muslims
African_American_Muslims
Muslim_scholars
Muslim_philosophers
Arabic_architecture
Criticism_of_Islam
American_Muslims
Religious_persecution
Islam_by_country
Sura
Populated_places_in_Saudi_Arabia
1890s_births
1997_FIFA_Confederations_Cup_players
Saudi_Arabian_footballers
Treaties_of_the_United_Kingdom
Treaties_of_the_United_States
Boundary_treaties
Aftermath_of_World_War_I
International_Labour_Organization_conventions
Islam_in_India
People_from_Damascus
Egyptian_films
Egyptian_actors
Arabic-language_films
Populated_places_in_the_Mount_Lebanon_Governorate
Populated_places_in_the_North_Governorate
Members_of_the_Parliament_of_Lebanon
Lebanese_Maronites
American_people_of_Lebanese_descent
Communes_of_Tunisia
Populated_places_in_Tunisia
History_of_Algeria
Former_Portuguese_colonies
Short-lived_states
History_of_North_Africa
Muslim_dynasties
Moroccan_footballers
Morocco_international_footballers
People_from_Casablanca
Moroccan_writers
History_of_Morocco
Greek_Orthodox_Patriarchs_of_Alexandria
Syriac_people
Lists_of_religious_leaders_by_year
History_of_Lancashire
Districts_of_Greater_Manchester
Industrial_Revolution
People_from_Rochdale
English_inventions
People_of_the_Industrial_Revolution
History_of_the_textile_industry
Archaeological_sites_in_Israel
History_of_Jerusalem
Neighbourhoods_of_Jerusalem
Members_of_the_Israel_Academy_of_Sciences_and_Humanities
Israeli_poets
Jews_from_Galicia_(Eastern_Europe)
Hebrew_University_of_Jerusalem_faculty
Israeli_journalists
Moroccan_Jews
Israeli_businesspeople
Tel_Aviv_University_faculty
Israeli_educators
Israeli_lawyers
Members_of_the_Knesset
Israeli_Labor_Party_politicians
Alignment_(political_party)_politicians
Defunct_political_parties_in_Israel
People_from_Tel_Aviv
Hebrew_University_of_Jerusalem_alumni
Likud_politicians
People_from_Jerusalem
People_from_Haifa
Tel_Aviv_University_alumni
Belarusian_Jews
Mapai_politicians
Zionists
Polish_emigrants_to_Israel
Polish_Jews
Jews_in_Ottoman_and_British_Palestine
Ukrainian_Jews
History_of_Israel
Zionism
Ashkenazi_Jews
Sephardi_Jews
Jewish_historians
Lithuanian_Jews
Austrian_Jews
Jewish_atheists
Irregular_military
IsraeliPalestinian_conflict
ArabIsraeli_conflict
Israeli_composers
Jewish_singers
Jewish_musicians
Kibbutzim
Kibbutz_Movement
Community_settlements_in_Israel
Moshavim
Israeli_settlements
Local_councils_in_Israel
Israeli_emigrants_to_the_United_States
Villages_in_the_West_Bank
Israeli_artists
Arab_villages_depopulated_during_the_1948_ArabIsraeli_War
History_of_Palestine
American_people_of_Palestinian_descent
Israeli_Jews
Jews_who_emigrated_to_the_United_Kingdom_to_escape_Nazism
Jewish_refugees
English_Bible_translations
Gospel_of_Matthew_verses
Sermon_on_the_Mount
Hebrew_Bible_places
Hebrew_Bible_people
Torah_people
Former_populated_places_in_Southwest_Asia
American_Orthodox_rabbis
21st-century_rabbis
20th-century_rabbis
Kabbalists
Early_Acharonim
Rabbis_in_Ottoman_and_British_Palestine
Jewish_history
Judaism-related_controversies
Hebrew_words_and_phrases
19th-century_rabbis
Haredi_rabbis_in_Israel
Rosh_yeshivas
Hasidic_rabbis_in_Europe
Converts_to_Judaism
Mishnah_rabbis
Burials_at_the_Mount_of_Olives_(Jewish)
Philosophers_of_Judaism
Jewish_theologians
Christian_and_Jewish_interfaith_topics
American_Orthodox_Jews
Gnosticism
Catholic_liturgy
Eastern_Orthodoxy
Eastern_Catholicism
Christian_liturgy,_rites,_and_worship_services
Eastern_Christian_liturgy
Christian_festivals_and_holy_days
Religious_behaviour_and_experience
Christian_prayer
Christian_hymns
Judeo-Christian_topics
Saints_from_the_Holy_Land
New_Testament_people
New_Testament_papyri
Greek_New_Testament_uncials
9th-century_biblical_manuscripts
6th-century_biblical_manuscripts
Greek_New_Testament_lectionaries
11th-century_biblical_manuscripts
Bibliothque_nationale_de_France_collections
Greek_New_Testament_minuscules
12th-century_biblical_manuscripts
13th-century_biblical_manuscripts
10th-century_biblical_manuscripts
14th-century_biblical_manuscripts
Biblical_scholars
Manuscripts
Ancient_Christian_controversies
Theologians
Theology
Psalms
Christian_eschatology
Biblical_phrases
Christian_Hebraists
Jews_and_Judaism_in_the_Roman_Empire
Christianity-related_controversies
People_celebrated_in_the_Lutheran_liturgical_calendar
Anglican_saints
Christian_terms
Christian_theologians
Christian_mystics
Christian_philosophy
Christian_theology
Christian_iconography
Magic_(paranormal)
Secret_societies
Child_saints
Eastern_Orthodox_liturgical_days
Articles_about_multiple_people
Greek_saints
Gallo-Roman_saints
5th-century_Christian_saints
Italian_saints
4th-century_Christian_martyr_saints
Anatolian_Roman_Catholic_saints
Saints_from_Anatolia
4th-century_Christian_saints
4th-century_bishops
Egyptian_saints
4th-century_Romans
3rd-century_Christian_martyr_saints
Christian_martyrs_of_the_Roman_era
Eastern_Catholic_saints
Eastern_Orthodox_saints
Roman_Catholic_saints
13th-century_Christian_saints
Sibling_duos
Converts_to_Christianity
Female_saints
Bishops_of_the_Assyrian_Church_of_the_East
Ancient_Greek_philosophers
Control_theorists
Epidemiologists
Scholastic_philosophers
Harvard_Fellows
Tufts_University_faculty
Indian_emigrants_to_the_United_States
Tufts_University_alumni
Religion_and_science
Spirituality
University_of_Notre_Dame_faculty
Women_philosophers
Christian_philosophers
American_philosophers
Philosophers_of_mind
Epistemology
Philosophers_of_science
German-language_philosophers
Philosophy_of_science
Epistemological_theories
Philosophers_of_language
21st-century_philosophers
Analytic_philosophers
20th-century_philosophers
English_philosophers
British_philosophers
Gifford_Lecturers
German_philosophers
Jewish_philosophers
Moral_philosophers
Philosophical_terminology
Cognitive_science_literature
Aesthetics
Indexes_of_articles
19th-century_philosophers
Philosophical_concepts
Philosophy_of_language
Roman_Catholic_philosophers
Logicians
Philosophy_books
Semiotics
Ethics
Logic
Paradoxes
Polish_philosophers
Rice_University_faculty
University_of_Paris_alumni
University_of_Pittsburgh_faculty
University_of_North_Carolina_at_Chapel_Hill_faculty
Historians_of_science
Outlines
Cognitive_science
Emotions
Human_behavior
Consciousness_studies
Cognition
Perception
Social_philosophy
Political_theorists
Political_philosophy
Theories_of_history
Marxist_theorists
Social_sciences
Philosophy_of_law
Marxism
French_philosophers
Continental_philosophers
Literary_criticism
Critical_theory
Italian_philosophers
Duke_University_faculty
University_of_Texas_at_Austin_faculty
Yale_University_faculty
University_of_California,_San_Diego_faculty
Academics_of_Birkbeck,_University_of_London
Historiography
University_of_Paris_faculty
Communication
Polyhedra
Integers
Integer_sequences
Specific_letter-diacritic_combinations
Theoretical_computer_scientists
Folklore
Popes_of_the_Coptic_Orthodox_Church_of_Alexandria
Saint_Thomas_Christians
Politics_and_race
Human_rights
Danish_emigrants_to_the_United_States
American_people_of_Danish_descent
Eastern_Orthodox_Christians_from_the_United_States
Villages_in_Nowy_Dwr_Mazowiecki_County
People_from_Pasadena,_California
American_Seventh-day_Adventists
Secondary_schools_affiliated_with_the_Seventh-day_Adventist_Church
Expatriate_footballers_in_Norway
Molde_FK_players
Norwegian_expatriate_footballers
Norway_international_footballers
Rosenborg_BK_players
Norwegian_Premier_League_players
SK_Brann_players
Norwegian_footballers
Vlerenga_Fotball_players
Lillestrm_SK_players
FK_Lyn_players
Troms_IL_players
Viking_FK_players
Norwegian_football_managers
Norwegian_football_clubs
Waterford_United_F.C._players
Derry_City_F.C._players
St_Patrick's_Athletic_F.C._players
League_of_Ireland_players
Republic_of_Ireland_association_footballers
Shelbourne_F.C._players
Drogheda_United_F.C._players
Bohemian_F.C._players
Dundalk_F.C._players
People_from_County_Dublin
League_of_Ireland_managers
Shamrock_Rovers_F.C._players
Sligo_Rovers_F.C._players
Home_Farm_F.C._players
People_from_Dublin_(city)
People_from_Luton
200910_domestic_association_football_leagues
People_from_Chester
Road_accident_deaths_in_England
Jamaican_footballers
Jamaica_international_footballers
Players_in_the_Welsh_Premier_League
Nelson_F.C._players
Accrington_Stanley_F.C._(1891)_players
People_from_Stoke-on-Trent
People_from_Blackpool
Republic_of_Ireland_B_international_footballers
Republic_of_Ireland_international_footballers
Republic_of_Ireland_under-21_international_footballers
Newport_County_A.F.C._players
Defunct_football_venues_in_England
English_football_chairmen_and_investors
Stoke_City_F.C._seasons
Chester_City_F.C._players
Telford_United_F.C._players
Woking_F.C._players
Ebbsfleet_United_F.C._players
Margate_F.C._players
Defunct_English_football_clubs
Athenian_League
Isthmian_League
Bath_City_F.C._players
Nuneaton_Town_F.C._players
Worcester_City_F.C._players
Hednesford_Town_F.C._players
FA_Cup_Finals
Crewe_Alexandra_F.C._players
Port_Vale_F.C._seasons
Port_Vale_F.C._players
Stafford_Rangers_F.C._players
Northwich_Victoria_F.C._players
Gateshead_F.C._players
Forest_Green_Rovers_F.C._players
Morecambe_F.C._players
Kettering_Town_F.C._players
Crawley_Town_F.C._players
Accrington_Stanley_F.C._players
Weymouth_F.C._players
Aldershot_Town_F.C._players
Macclesfield_Town_F.C._players
Southport_F.C._players
Halifax_Town_A.F.C._players
People_from_Sheffield
Scarborough_F.C._players
Dagenham_&_Redbridge_F.C._players
Kidderminster_Harriers_F.C._players
Tamworth_F.C._players
Member_clubs_of_the_Southern_Football_League
Grays_Athletic_F.C._players
Gillingham_F.C._players
Barrow_A.F.C._players
Association_football_goalkeepers_who_have_scored
Association_football_terminology
1998_FIFA_World_Cup_players
Wales_under-21_international_footballers
Welsh_footballers
Swansea_City_A.F.C._players
Welsh_football_managers
Cheltenham_Town_F.C._players
Torquay_United_F.C._players
Doncaster_Rovers_F.C._players
Chesterfield_F.C._players
Scunthorpe_United_F.C._players
Huddersfield_Town_F.C._players
Blackpool_F.C._players
Cardiff_City_F.C._players
Wales_international_footballers
Hereford_United_F.C._players
Swindon_Town_F.C._players
Stoke_City_F.C._players
Colchester_United_F.C._players
Milton_Keynes_Dons_F.C._players
Grimsby_Town_F.C._players
Carlisle_United_F.C._players
Tottenham_Hotspur_F.C._players
Charlton_Athletic_F.C._players
Millwall_F.C._players
York_City_F.C._players
Conference_National_players
Black_English_sportspeople
Association_football_utility_players
Preston_North_End_F.C._players
Chelsea_F.C._players
Oldham_Athletic_A.F.C._players
Derby_County_F.C._players
Wolverhampton_Wanderers_F.C._players
Birmingham_City_F.C._players
Portsmouth_F.C._players
Sunderland_A.F.C._players
Manchester_City_F.C._players
Queens_Park_Rangers_F.C._players
Hull_City_A.F.C._players
Norwich_City_F.C._players
Sheffield_United_F.C._players
Brighton_&_Hove_Albion_F.C._players
Fulham_F.C._players
Manchester_United_F.C._players
West_Bromwich_Albion_F.C._players
Wigan_Athletic_F.C._players
Ipswich_Town_F.C._players
Barnsley_F.C._players
The_Football_League_managers
England_B_international_footballers
FA_Cup_seasons
Premier_League_players
England_under-21_international_footballers
English_footballers
The_Football_League_players
The_Football_League_seasons
England_international_footballers
English_football_clubs_201011_season
Leeds_United_A.F.C._players
Premier_League_managers
English_football_managers
Association_football_forwards
Luton_Town_F.C._players
Everton_F.C._players
Nottingham_Forest_F.C._players
Football_venues_in_England
Bolton_Wanderers_F.C._players
Arsenal_F.C._players
Blackburn_Rovers_F.C._players
English_Football_Hall_of_Fame_inductees
Sheffield_Wednesday_F.C._players
Liverpool_F.C._players
Black_British_sportspeople
England_youth_international_footballers
Middlesbrough_F.C._players
Crystal_Palace_F.C._players
Leicester_City_F.C._players
Reading_F.C._players
Coventry_City_F.C._players
West_Ham_United_F.C._players
Aston_Villa_F.C._players
Brentford_F.C._players
Watford_F.C._players
Association_football_goalkeepers
Association_football_wingers
Association_football_midfielders
Bradford_City_A.F.C._players
English_expatriate_footballers
Burnley_F.C._players
Newcastle_United_F.C._players
Oxford_United_F.C._players
Shrewsbury_Town_F.C._players
England_semi-pro_international_footballers
Lincoln_City_F.C._players
Boston_United_F.C._players
Rushden_&_Diamonds_F.C._players
Walsall_F.C._players
Mansfield_Town_F.C._players
Notts_County_F.C._players
A.F.C._Bournemouth_players
Barnet_F.C._players
Stevenage_F.C._players
English_football_clubs
Exeter_City_F.C._players
Plymouth_Argyle_F.C._players
Wimbledon_F.C._players
Stockport_County_F.C._players
Sportspeople_from_Liverpool
Tranmere_Rovers_F.C._players
Association_football_fullbacks
Rochdale_A.F.C._players
Wrexham_F.C._players
Wycombe_Wanderers_F.C._players
Bristol_City_F.C._players
Northampton_Town_F.C._players
Peterborough_United_F.C._players
Yeovil_Town_F.C._players
Bury_F.C._players
Southend_United_F.C._players
Leyton_Orient_F.C._players
UEFA_Pro_Licence_holders
Cambridge_United_F.C._players
Expatriate_footballers_in_England
2002_FIFA_World_Cup_players
2006_FIFA_World_Cup_players
2010_FIFA_World_Cup_players
Darlington_F.C._players
Hartlepool_United_F.C._players
Sportspeople_from_London
Rotherham_United_F.C._players
English_people_of_Jamaican_descent
Association_football_central_defenders
Burton_Albion_F.C._players
1990_FIFA_World_Cup_players
Association_football_defenders
UEFA_Euro_2004_players
UEFA_Euro_1996_players
Southampton_F.C._players
UEFA_Euro_2000_players
Bristol_Rovers_F.C._players
Blackpool_F.C._seasons
English_football_referees
UEFA_Euro_1988_players
Northern_Ireland_international_footballers
People_from_Wolverhampton
Aldershot_F.C._players
People_from_Nottingham
Members_of_the_Order_of_the_British_Empire
English_people_of_Nigerian_descent
UEFA_Euro_2008_players
1986_FIFA_World_Cup_players
1994_FIFA_World_Cup_players
Gainsborough_Trinity_F.C._players
Worksop_Town_F.C._players
Hyde_F.C._players
Stalybridge_Celtic_F.C._players
Altrincham_F.C._players
People_from_Manchester
People_from_Birmingham,_West_Midlands
British_association_football_commentators
1958_FIFA_World_Cup_players
Bradford_A.F.C._players
Queen's_Park_F.C._players
Queen_of_the_South_F.C._players
Albion_Rovers_F.C._players
Hamilton_Academical_F.C._players
People_from_Aberdeen
Berwick_Rangers_F.C._players
Clydebank_F.C._players
East_Fife_F.C._players
Clyde_F.C._players
Stenhousemuir_F.C._players
People_from_Bellshill
Greenock_Morton_F.C._players
Stranraer_F.C._players
Sportspeople_from_Edinburgh
Alloa_Athletic_F.C._players
Scottish_Junior_Football_Association_players
Raith_Rovers_F.C._players
Partick_Thistle_F.C._players
Ross_County_F.C._players
Inverness_Caledonian_Thistle_F.C._players
Livingston_F.C._players
Cowdenbeath_F.C._players
Montrose_F.C._players
Heart_of_Midlothian_F.C._players
Ayr_United_F.C._players
St._Mirren_F.C._players
Aberdeen_F.C._players
Arbroath_F.C._players
Forfar_Athletic_F.C._players
People_from_Dundee
Dumbarton_F.C._players
Scottish_expatriate_footballers
Brechin_City_F.C._players
Expatriate_footballers_in_Scotland
Airdrieonians_F.C._players
Hibernian_F.C._players
Motherwell_F.C._players
Kilmarnock_F.C._players
Rangers_F.C._players
Scottish_football_managers
Celtic_F.C._players
Scotland_international_footballers
Scotland_B_international_footballers
St._Johnstone_F.C._players
Dundee_F.C._players
Scottish_Football_League_players
Scotland_under-21_international_footballers
Scottish_Premier_League_players
Scottish_footballers
Dundee_United_F.C._players
Sportspeople_from_Glasgow
Dunfermline_Athletic_F.C._players
Falkirk_F.C._players
Stirling_Albion_F.C._players
People_from_Paisley
Scottish_Cup_seasons
People_from_Stirling
Expatriate_footballers_in_Iceland
2001_FIFA_Confederations_Cup_players
People_from_Bolton
FIFA_World_Cup_referees
Expatriate_footballers_in_the_Netherlands
Years_in_association_football
2005_in_association_football
1954_FIFA_World_Cup_players
1982_FIFA_World_Cup_players
2005_FIFA_Confederations_Cup_players
UEFA_Euro_1992_players
1966_FIFA_World_Cup_players
2003_FIFA_Confederations_Cup_players
Living_people
A.C._Mantova_players
People_from_the_Province_of_Milan
SPAL_1907_players
Atalanta_B.C._players
F.C._Messina_Peloro_players
Pisa_Calcio_players
F.B.C._Unione_Venezia_players
Ascoli_Calcio_1898_players
A.S._Livorno_Calcio_players
U.S._Avellino_players
A.C._Ancona_players
Empoli_F.C._players
A.C._ChievoVerona_players
U.S._Cremonese_players
Genoa_C.F.C._players
Reggina_Calcio_players
U.S._Lecce_players
Perugia_Calcio_players
A.C._Monza_Brianza_1912_players
A.C._Arezzo_players
Hellas_Verona_F.C._players
Vicenza_Calcio_players
A.C._Cesena_players
Pescara_Calcio_players
Salernitana_Calcio_1919_players
U.S._Foggia_players
A.S._Bari_players
Serie_B_clubs
A.S._Varese_1910_players
A.C._Pistoiese_players
A.C._Reggiana_1919_players
U.S._Triestina_Calcio_players
Modena_F.C._players
Calcio_Padova_players
Treviso_F.B.C._1993_players
Ravenna_Calcio_players
S.S.C._Napoli_players
Como_Calcio_1907_players
Torino_F.C._players
Bologna_F.C._1909_players
F.C._Crotone_players
U.S._Citt_di_Palermo_players
Calcio_Catania_players
A.C._Siena_players
Ternana_Calcio_players
Italian_football_managers
Serie_A_managers
Cagliari_Calcio_players
A.S._Roma_players
Serie_B_footballers
Italian_footballers
Italy_under-21_international_footballers
Parma_F.C._players
Brescia_Calcio_players
ACF_Fiorentina_players
Udinese_Calcio_players
U.C._Sampdoria_players
S.S._Lazio_players
Serie_A_footballers
A.C._Milan_players
Italy_international_footballers
Juventus_F.C._players
Olympic_footballers_of_Italy
F.C._Internazionale_Milano_players
Italian_expatriate_footballers
Expatriate_footballers_in_Italy
FIFA_100
Piacenza_Calcio_players
U.S._Alessandria_Calcio_1912_players
FIFA_World_Cup-winning_players
2009_FIFA_Confederations_Cup_players
Lists_of_association_football_players_by_club
1962_FIFA_World_Cup_players
Chelmsford_City_F.C._players
People_from_Blackburn
Southern_Football_League_players
People_from_Derby
UEFA_Euro_1980_players
1978_FIFA_World_Cup_players
UEFA_European_Football_Championship-winning_players
1970_FIFA_World_Cup_players
Pre-1914_association_football_players
Alumni_of_the_University_of_Salford
People_from_Salford
Footballers_at_the_1992_Summer_Olympics
Expatriate_footballers_in_Spain
FIFA_Confederations_Cup-winning_players
People_from_Sunderland,_Tyne_and_Wear
2008_Africa_Cup_of_Nations_players
Football_leagues_in_England
Omiya_Ardija_players
Vissel_Kobe_players
Japan_Soccer_League_players
J._League_Division_2_players
J._League_Division_1_players
Kashiwa_Reysol_players
Cerezo_Osaka_players
Shonan_Bellmare_players
Kyoto_Sanga_F.C._players
JEF_United_Ichihara_Chiba_players
People_from_Shizuoka_Prefecture
Shimizu_S-Pulse_players
Avispa_Fukuoka_players
Vegalta_Sendai_players
Kawasaki_Frontale_players
Consadole_Sapporo_players
Tokyo_Verdy_1969_players
Jbilo_Iwata_players
Japanese_footballers
Japan_international_footballers
AFC_Asian_Cup-winning_players
J._League_players
Japanese_expatriate_footballers
Nagoya_Grampus_Eight_players
Oita_Trinita_players
Sanfrecce_Hiroshima_players
Urawa_Red_Diamonds_players
Yokohama_F._Marinos_players
Olympic_footballers_of_Japan
Gamba_Osaka_players
People_from_Chiba_Prefecture
Japanese_football_managers
People_from_Saitama_Prefecture
People_from_Hiroshima_(city)
Footballers_at_the_1964_Summer_Olympics
People_from_Western_Tokyo
1995_King_Fahd_Cup_players
People_from_Kanagawa_Prefecture
People_from_Hygo_Prefecture
People_from_Bury
Calcio_Lecco_1912_players
Football_venues_in_Italy
A.S._Lucchese-Libertas_players
Scottish_football_clubs
Scottish_Junior_Football_Association_clubs
People_from_Huddersfield
Non-departmental_public_bodies_of_the_United_Kingdom_government
Grade_II*_listed_buildings_in_Cheshire
Country_houses_in_Cheshire
Grade_I_listed_buildings_in_Cheshire
John_Douglas_buildings
Grade_II_listed_buildings_in_Cheshire
Grade_I_listed_houses
Civil_parishes_in_Cheshire
Villages_in_Cheshire
People_from_Cheshire
Civil_parishes_in_Lancashire
Villages_in_Lancashire
Road_safety
PSV_Eindhoven_players
Dutch_footballers
Netherlands_international_footballers
Eredivisie_players
AFC_Ajax_players
Dutch_expatriate_footballers
SBV_Vitesse_players
AZ_Alkmaar_players
Feyenoord_players
VVV-Venlo_players
FC_Volendam_players
NEC_Nijmegen_players
Dutch_people_of_Moroccan_descent
Willem_II_Tilburg_players
Roda_JC_players
SC_Heerenveen_players
Go_Ahead_Eagles_players
NAC_Breda_players
Excelsior_Rotterdam_players
Eerste_Divisie_players
FC_Utrecht_players
FC_Twente_players
ADO_Den_Haag_players
De_Graafschap_players
RKC_Waalwijk_players
Sparta_Rotterdam_players
FC_Groningen_players
People_from_Rotterdam
Dutch_football_managers
People_from_Paramaribo
Dutch_people_of_Surinamese_descent
People_from_Eindhoven
People_from_Limburg_(Netherlands)
Dutch_football_clubs
Cities_and_towns_in_Emilia-Romagna
Castles_in_Italy
Provinces_of_Italy
Cities_and_towns_in_Piedmont
Cities_and_towns_in_Liguria
Cities_and_towns_in_Lazio
World_Heritage_Sites_in_Italy
Cities_and_towns_in_Calabria
Lega_Pro_Seconda_Divisione_clubs
Lega_Pro_Prima_Divisione_clubs
Italian_football_clubs
Localities_of_Cilento
Cities_and_towns_in_Lombardy
Cities_and_towns_in_Molise
Cities_and_towns_in_Friuli-Venezia_Giulia
19th-century_Italian_people
Italian_businesspeople
People_from_Dumfries
Kazakhstani_footballers
Kazakhstan_international_footballers
Lists_of_people_sharing_a_surname
Greek_football_clubs
Aris_Thessaloniki_F.C._players
Panionios_G.S.S._players
Skoda_Xanthi_F.C._players
Iraklis_FC_players
Olympiacos_F.C._players
AEK_Athens_F.C._players
Expatriate_footballers_in_Greece
PAOK_F.C._players
Greece_international_footballers
Greek_footballers
Superleague_Greece_players
Panathinaikos_footballers
OFI_Crete_players
Larissa_F.C._players
People_from_Thessaloniki
French_people_of_Moroccan_descent
French_people_of_Polish_descent
People_from_Dakar
Senegalese_footballers
Senegal_international_footballers
Senegalese_expatriate_footballers
AS_Saint-tienne_players
French_people_of_Spanish_descent
French_people_of_Italian_descent
FC_Gueugnon_players
RCF_Paris_players
Red_Star_Saint-Ouen_players
FC_Ste_players
French_football_clubs
Olympique_de_Marseille_players
Montpellier_HSC_players
RC_Strasbourg_players
AS_Cannes_players
FC_Nantes_players
FC_Girondins_de_Bordeaux_players
FC_Sochaux-Montbliard_players
Toulouse_FC_players
AS_Monaco_FC_players
French_expatriate_footballers
Olympique_Lyonnais_players
Ligue_1_players
French_footballers
France_international_footballers
Ligue_2_players
France_under-21_international_footballers
AJ_Auxerre_players
Lille_OSC_players
Stade_Rennais_F.C._players
Nmes_Olympique_players
Paris_Saint-Germain_F.C._players
French_football_managers
Ligue_1_managers
OGC_Nice_players
RC_Lens_players
Tours_FC_players
Stade_Lavallois_players
Grenoble_Foot_38_players
Amiens_SC_players
AS_Nancy_players
FC_Rouen_players
Angers_SCO_players
LB_Chteauroux_players
Le_Havre_AC_players
FC_Metz_players
FC_Istres_players
FC_Lorient_players
EA_Guingamp_players
SC_Bastia_players
Troyes_AC_players
Stade_Brestois_29_players
Valenciennes_FC_players
Le_Mans_FC_players
SM_Caen_players
AC_Ajaccio_players
CS_Sedan_Ardennes_players
Stade_de_Reims_players
Chamois_Niortais_F.C._players
French_people_of_Senegalese_descent
Clermont_Foot_players
US_Crteil-Lusitanos_players
People_from_Marseille
French_people_of_Black_African_descent
FC_Martigues_players
Sportspeople_from_Paris
Expatriate_footballers_in_France
French_people_of_Algerian_descent
Ivorian_expatriate_footballers
UEFA_Euro_1984_players
Cameroonian_expatriate_footballers
People_from_Strasbourg
2006_Africa_Cup_of_Nations_players
2004_African_Cup_of_Nations_players
2010_Africa_Cup_of_Nations_players
Cemeteries_on_the_National_Register_of_Historic_Places_in_Massachusetts
Villages_in_Puawy_County
Local_councils_of_the_Boy_Scouts_of_America
Municipalities_in_Almera
Populated_places_in_Almera
Belfast-built_ships
1987_live_albums
Hard_rock_songs
Populated_places_in_Angola
Municipalities_of_Angola
20th-century_diplomatic_conferences
21st-century_diplomatic_conferences
Socialist_International
Members_of_the_South_West_Africa_People's_Organization
Members_of_the_National_Assembly_of_Namibia
SWAPO_politicians
District_capitals_in_Vietnam
Communes_of_Bac_Giang_Province
Populated_places_in_Bac_Giang_Province
Communes_of_Bac_Kan_Province
Populated_places_in_Bac_Kan_Province
Non-governmental_organizations_based_in_the_United_States
Child-related_organizations
Children's_charities
International_charities
International_non-profit_organizations
Development_charities
Charities_based_in_the_United_States
International_nongovernmental_organizations
Organizations_established_in_2000
Health_charities
Humanitarian_aid_organizations
Non-profit_organizations_based_in_California
Social_welfare_charities
Charities
Non-governmental_organizations
Charities_based_in_the_United_Kingdom
Non-profit_organizations_based_in_the_United_States
Charities_based_in_Canada
Non-profit_organisations_based_in_India
Non-profit_organisations_based_in_Australia
Non-profit_organizations_based_in_Canada
Organizations_based_in_New_York_City
Anti-poverty_advocates
Non-profit_organizations_based_in_New_York
Development
International_development
Non-profit_organizations_based_in_Washington,_D.C.
Non-profit_organizations
Foundations_based_in_the_United_States
People_from_Caracas
Populated_places_in_Venezuela
Lists_of_metro_stations
Rivers_of_Venezuela
Neighborhoods_in_Washington,_D.C.
Diplomatic_missions_in_Washington,_D.C.
Monuments_and_memorials_in_Washington,_D.C.
Outdoor_sculptures_in_Washington,_D.C.
National_Register_of_Historic_Places_in_Washington,_D.C.
National_Register_of_Historic_Places_in_Maryland
Historic_districts_in_Maryland
People_from_Prince_George's_County,_Maryland
Maryland_State_Senators
Members_of_the_United_States_House_of_Representatives_from_Maryland
Baltimore_City_College_alumni
Maryland_lawyers
People_from_Baltimore,_Maryland
University_of_Maryland,_College_Park_alumni
Maryland_Democrats
Members_of_the_Maryland_House_of_Delegates
Maryland_Republicans
African_American_women_in_politics
People_from_Montgomery_County,_Maryland
People_from_Bethesda,_Maryland
State_highways_in_Maryland
Populated_places_in_Maryland_with_African_American_majority_populations
Neighborhoods_in_Baltimore,_Maryland
Buildings_and_structures_in_Baltimore,_Maryland
National_Register_of_Historic_Places_in_Baltimore,_Maryland
Battles_and_operations_of_the_Vietnam_War
Battles_involving_Vietnam
Vietnam_War
Battles_involving_the_United_States
People_of_the_Vietnam_War
American_people_of_Vietnamese_descent
French_military_personnel_of_World_War_II
Grand_Croix_of_the_Lgion_d'honneur
French_military_personnel_of_World_War_I
Recipients_of_the_Mdaille_Militaire
Commandeurs_of_the_Lgion_d'honneur
Liberty_ships
Vietnam_War_auxiliary_ships_of_the_United_States
Cold_War_auxiliary_ships_of_the_United_States
Ships_built_in_Maryland
Clemson_class_destroyers
Wickes_class_destroyers
World_War_II_auxiliary_ships_of_the_United_States
Ships_sunk_as_targets
Ships_built_in_Los_Angeles,_California
Ships_built_in_Washington_(state)
John_C._Butler_class_destroyer_escorts
Ships_built_in_San_Francisco,_California
Ships_built_in_Virginia
Ships_present_during_the_attack_on_Pearl_Harbor
Ships_built_in_New_Jersey
Ships_at_the_Japanese_Instrument_of_Surrender
Fletcher_class_destroyers_of_the_United_States_Navy
Ships_damaged_by_kamikaze_attack
Buckley_class_destroyer_escorts
Ships_built_in_Massachusetts
Gearing_class_destroyers_of_the_United_States_Navy
Ships_built_in_Texas
United_States_Navy_Virginia-related_ships
Ships_built_in_Oregon
Ships_built_in_Pennsylvania
Shipwrecks_in_the_Pacific_Ocean
Freighters
Ships_built_in_Wisconsin
Ships_built_in_Richmond,_California
Ships_built_in_Connecticut
Ships_built_in_Maine
Balao_class_submarines
Ships_built_in_Vallejo,_California
Ships_damaged_by_aircraft
Ships_built_in_Mississippi
United_States_Navy_proposed_ships
United_States_Navy_unclassified_miscellaneous
Ships_on_the_National_Register_of_Historic_Places
LST-542_class_tank_landing_ships
Maritime_incidents_in_1943
World_War_II_shipwrecks_in_the_Pacific_Ocean
Maritime_incidents_in_1944
Ships_sunk_by_American_submarines
Ships_sunk_by_aircraft
Pacific_Ocean_theater_of_World_War_II
Conflicts_in_1942
Conflicts_in_1943
American_military_personnel_killed_in_World_War_II
Recipients_of_the_Navy_Cross
South_West_Pacific_theatre_of_World_War_II
Imperial_Japanese_Navy_admirals
History_of_the_United_States_Navy
Ships_of_the_United_States_Coast_Guard
United_States_naval_aviators
American_people_of_World_War_II
Naval_War_College_alumni
United_States_Naval_Academy_alumni
United_States_Navy_admirals
United_States_Navy_officers
United_States_Navy
Tugs_of_the_United_States_Navy
Military_electronics_of_the_United_States
Military_radio_systems
Joint_Electronics_Type_Designation_System
Military_communications
Flora_of_New_Zealand
Oceanography
American_people_of_the_Indian_Wars
German_emigrants_to_the_United_States
United_States_Army_soldiers
Army_Medal_of_Honor_recipients
American_military_personnel_killed_in_the_Vietnam_War
American_military_personnel_of_the_PhilippineAmerican_War
People_from_New_York
People_from_Pennsylvania
United_States_Navy_sailors
American_military_personnel_of_the_SpanishAmerican_War
Navy_Medal_of_Honor_recipients
Foreign_born_Medal_of_Honor_recipients
Irish_emigrants_to_the_United_States
American_military_personnel_of_the_Indian_Wars
Swedish_emigrants_to_the_United_States
Union_Army_soldiers
British_emigrants_to_the_United_States
Lists_of_islands
Dobloug_Prize_winners
Norwegian_novelists
Norwegian_children's_writers
Norwegian_poets
Fathers_of_the_Constitution_of_Norway
Norwegian_politicians
Norwegian_trade_unionists
Socialist_Left_Party_(Norway)_politicians
Deputy_members_of_the_Parliament_of_Norway
Oslo_politicians
Government_ministers_of_Norway
Christian_Democratic_Party_(Norway)_politicians
Norwegian_state_secretaries
Norwegian_women_in_politics
County_Governors_of_Norway
Labour_Party_(Norway)_politicians
Centre_Party_(Norway)_politicians
Conservative_Party_(Norway)_politicians
Liberal_Party_(Norway)_politicians
Members_of_the_Parliament_of_Norway
Progress_Party_(Norway)_politicians
Islands_of_the_Solomon_Islands
Communes_of_Ctes-d'Armor
Communes_of_Ille-et-Vilaine
Shipwrecks_in_the_Atlantic_Ocean
British_naval_personnel_of_the_Napoleonic_Wars
Royal_Navy_officers
Royal_Navy_admirals
British_naval_personnel_of_the_American_Revolutionary_War
British_naval_personnel_of_the_French_Revolutionary_Wars
Naval_battles_involving_France
Ships_built_in_England
Deptford-built_ships
Royal_Navy_ships_of_the_line
Ships_of_the_line_of_the_United_Kingdom
French_Navy_ships_of_the_line
French_Navy_admirals
French_Navy_officers
Naval_battles_involving_Great_Britain
Royal_Navy_ship_names
Piracy
Battles_involving_Prussia
Battles_involving_Russia
Battles_of_the_Napoleonic_Wars
French_generals
French_military_personnel_of_the_Napoleonic_Wars
French_soldiers
French_military_personnel_of_the_French_Revolutionary_Wars
French_commanders_of_the_Napoleonic_Wars
Battles_involving_France
British_Army_personnel_of_the_French_Revolutionary_Wars
British_Army_personnel_of_the_Napoleonic_Wars
Battles_involving_the_United_Kingdom
Battles_involving_Portugal
Battles_involving_Spain
Sieges_involving_France
Maritime_incidents_in_1941
Maritime_incidents_in_1942
Destroyer_classes
Ships_sunk_by_mines
Clyde-built_ships
Ships_damaged_by_naval_mines
World_War_II_shipwrecks_in_the_Mediterranean
Maritime_incidents_in_1940
Tyne-built_ships
Royal_Navy_officers_of_World_War_I
Ships_built_in_the_United_Kingdom
Ships_built_in_Danzig
U-boats_sunk_by_surface_craft
Ships_built_in_Bremen
Type_IX_U-boats
Ships_built_in_Hamburg
U-boats_commissioned_in_1916
Chatham-built_ships
Cruiser_classes
Plymouth-built_ships
Battleship_classes
Coastal_artillery
Small_combat_vessel_classes
Defunct_manufacturing_companies_of_the_United_States
High_schools_in_New_York
High_schools_in_Missouri
Private_schools_in_California
Private_schools_in_New_York
Roman_Catholic_secondary_schools_in_New_York
Boys'_schools_in_the_United_States
Girls'_schools_in_the_United_States
People_from_Fresno,_California
Buildings_and_structures_under_construction
Skyscrapers_in_Dubai
Twin_towers
Skyscrapers_between_250_and_299_meters
Fictional_characters_introduced_in_2003
Santa_Clara_University_alumni
Castles_in_Sweden
Gender
LGBT_parents
LGBT_rights_activists_from_the_United_States
LGBT_organizations_in_the_United_States
LGBT_Jews
LGBT_journalists
Lambda_Literary_Award_winners
Lesbian_writers
LGBT_Christians
LGBT_African_Americans
Discrimination
LGBT_people_from_the_United_States
LGBT_writers_from_the_United_States
Gay_writers
AIDS_activists
Lesbian_politicians
American_health_activists
Jewish_feminists
Gender_studies
Feminist_studies_scholars
American_feminist_writers
Feminist_writers
Feminist_organizations
American_feminists
Drag_queens
Women_physicians
Feminism_and_history
Women_of_the_Victorian_era
People_of_the_Edwardian_era
American_suffragists
American_women's_rights_activists
Human_sexuality
Boxers_at_the_1936_Summer_Olympics
Austrian_politicians
History_of_Austria
Cities_and_towns_in_Carinthia
People_from_Graz
Academy_of_Fine_Arts_Vienna_alumni
Austrian_painters
Cities_and_towns_in_Burgenland
Cricket_administration
Trinidad_and_Tobago_international_footballers
Trinidad_and_Tobago_footballers
American_choreographers
American_dancers
Lists_of_people_on_stamps
Instrumentals
2005_soundtracks
Third-wave_ska_groups
2006_greatest_hits_albums
Epic_Records_live_albums
Songs_produced_by_Brendan_O'Brien
2001_live_albums
2003_live_albums
Synthpop_groups
German_electronic_music_groups
German_musical_groups
American_industrial_music_groups
Electronic_music_groups
Musicians_from_Oregon
2005_greatest_hits_albums
Philips_Records_albums
Live_EPs
Songs_written_by_Diane_Warren
Epic_Records_compilation_albums
Parlophone_albums
VJs_(media_personalities)
Atlantic_Records_live_albums
Populated_places_in_Bamingui-Bangoran
Fictional_witches
Fictional_characters_introduced_in_1998
High_schools_in_Virginia
VH1_television_series
American_reality_television_series
Spanish_generals
Spanish_people_of_the_Spanish_Civil_War
Foreign_ministers_of_Spain
Government_ministers_of_Spain
Spanish_historians
Members_of_the_Royal_Spanish_Academy
Chronicles
Municipalities_in_Huesca
Populated_places_in_Huesca
Spanish_saints
Spanish_Roman_Catholic_saints
Clinical_research
Pharmaceutical_industry
Medical_ethics
Bioethics
People_from_Topeka,_Kansas
Nobel_Peace_Prize_laureates
American_pacifists
American_anti-war_activists
Peace_organizations
Nonviolence_advocates
Populated_places_in_the_Dominican_Republic
People_from_Ann_Arbor,_Michigan
Youth
Community_building
Social_movements
International_organizations
Songs_produced_by_Robert_John_"Mutt"_Lange
Populated_places_in_Jordan
Gekkonidae
Typhlopidae
Colubrids
Fauna_of_Southeast_Asia
Reptiles_of_Pakistan
Reptiles_of_Asia
Reptiles_of_Australia
Reptiles_of_the_United_States
Reptiles_of_Mexico
Skinks
Redirects_from_alternative_names
Shoegazing_musical_groups
1991_EPs
People_from_Kaliningrad
People_from_Knigsberg
German_scientists
Occitan_poets
Troubadours
Medieval_poets
People_from_Gloucester
Long-distance_footpaths_in_England
English_local_elections,_1999
English_local_elections,_2007
Villages_in_Hampshire
English_local_elections,_2003
English_District_Council_elections
English_local_elections,_2006
English_local_elections,_1998
English_local_elections,_2002
Villages_in_Surrey
Guildford
Horsham
Villages_in_West_Sussex
Communes_of_Aisne
Noble_titles
Benedictines
12th-century_Christian_saints
Chroniclers
Murdered_monarchs
Popes
Italian_popes
Italo-Normans
11th-century_Italian_people
Villages_in_Sandomierz_County
Villages_in_Puck_County
Former_principalities
House_of_Piast
Polish_coats_of_arms
Polish_nobility
Secular_senators_of_the_PolishLithuanian_Commonwealth
Polish_bishops
History_of_Poland_(15691795)
Polish_Roman_Catholics
Lithuanian_nobility
History_of_Prussia
Recipients_of_the_Order_of_the_White_Eagle_(Poland)
11th-century_rulers_in_Europe
Bohemian_Germans
Austro-Hungarian_people
Austrian_nobility
19th-century_Austrian_people
Austrian_people_of_German_descent
Bohemian_nobility
Polish_poets
Polish_writers
Polish_painters
Polish_journalists
German_nobility
House_of_Wettin
House_of_Ascania
Nobility_of_Georgia_(country)
Bagrationi_dynasty
History_of_Georgia_(country)
Russian_noble_families
Civil_parishes_in_Suffolk
Mid_Suffolk
Villages_in_Suffolk
Babergh
People_from_Suffolk
People_from_Ipswich
Heads_of_state
Blade_weapons
English_Jesuits
Beatified_people
People_executed_under_the_Tudors
English_Roman_Catholic_priests
People_executed_by_hanging,_drawing_and_quartering
16th-century_Roman_Catholic_martyrs
Martyred_Roman_Catholic_priests
16th-century_venerated_Christians
17th-century_Roman_Catholic_priests
Converts_to_Roman_Catholicism
6th-century_Christian_saints
Christians_of_the_Crusades
Auschwitz_concentration_camp_victims
American_vegans
Animal_rights_advocates
Animal_rights_movement
Animal_rights
Animal_testing
English_Renaissance_plays
17th-century_actors
English_publishers_(people)
Shakespearean_scholars
16th-century_poets
English_printers
3rd-century_BC_rulers
Roman_mythology
Trojans
Characters_in_the_Iliad
People_of_the_Trojan_War
Women_in_Greek_mythology
Mythological_kings
Greek_mythology
Sea_and_river_gods
Greek_legendary_creatures
Greek_gods
Greek_goddesses
Nymphs
Ancient_Greek_cities
Former_populated_places_in_Greece
Populated_places_in_Arcadia
Populated_places_in_Achaea
Populated_places_in_Elis
Dragons
Islands_of_Greece
Ancient_Athenians
5th-century_BC_Greek_people
3rd-century_BC_Greek_people
4th-century_BC_Greek_people
4th-century_BC_rulers
Poetic_rhythm
Celtic_culture
Latin_words_and_phrases
Former_populated_places_in_Italy
Germanic_peoples
Ancient_Germanic_peoples
History_of_the_Germanic_peoples
Iron_Age_Europe
Ethnic_groups_in_Europe
Ancient_Roman_architecture
Roman_Empire
Julio-Claudian_Dynasty
1st-century_Romans
Ancient_Roman_women
Imperial_Roman_consuls
3rd-century_Romans
2nd-century_Romans
Ancient_Roman_religion
3rd-century_BC_Romans
2nd-century_BC_Romans
Roman_Republican_consuls
Ancient_Roman_senators
Ancient_Rome
Roman_law
Roman_gentes
Ancient_Roman_families
Prosopography_of_Ancient_Rome
1st-century_BC_Romans
Ancient_Roman_generals
Ancient_peoples
Roman_goddesses
Year_of_birth_unknown
Year_of_death_unknown
1st-century_BC_Asian_rulers
Late_Antiquity
Multi-sport_events
Benedictine_monasteries_in_Germany
German_toponyms
Mountains_of_Bavaria
History_of_Bavaria
Dacia
Ancient_cities
Roman_forts_in_Romania
Family_trees
Frazioni_of_the_Province_of_Perugia
Railway_lines_in_Baden-Wrttemberg
Towns_in_Baden-Wrttemberg
University_of_Vienna_faculty
University_of_Halle_alumni
People_from_the_Electorate_of_Saxony
German_academics
People_from_the_Margraviate_of_Brandenburg
German_classical_scholars
19th-century_German_people
Ludwig_Maximilian_University_of_Munich_alumni
People_from_Wrocaw
University_of_Mnster_faculty
University_of_Knigsberg_faculty
University_of_Knigsberg_alumni
People_from_the_Province_of_Prussia
People_from_the_Province_of_Silesia
University_of_Halle-Wittenberg_alumni
Recipients_of_the_Pour_le_Mrite_(civil_class)
University_of_Heidelberg_faculty
German_jurists
University_of_Greifswald_faculty
University_of_Breslau_alumni
Members_of_the_Prussian_Academy_of_Sciences
University_of_Gttingen_faculty
University_of_Bonn_alumni
University_of_Bonn_faculty
University_of_Freiburg_alumni
University_of_Leipzig_faculty
University_of_Marburg_alumni
University_of_Gttingen_alumni
University_of_Heidelberg_alumni
Ludwig_Maximilian_University_of_Munich_faculty
University_of_Strasbourg_faculty
Humboldt_University_of_Berlin_faculty
Humboldt_University_of_Berlin_alumni
University_of_Leipzig_alumni
University_of_Jena_faculty
University_of_Jena_alumni
University_of_Tbingen_alumni
University_of_Tbingen_faculty
German_economists
German_orientalists
German_historians
People_from_the_Grand_Duchy_of_Baden
People_from_the_Kingdom_of_Saxony
German_Jews
German_educators
German_philologists
People_from_Halle,_Saxony-Anhalt
German_theologians
People_from_Leipzig
People_from_Stuttgart
Recipients_of_the_Order_of_Merit_of_the_Federal_Republic_of_Germany
Prussian_politicians
People_from_Heidelberg
People_from_Cologne
Historians_of_religion
People_from_Frankfurt
German_Lutherans
Commanders_Crosses_of_the_Order_of_Merit_of_the_Federal_Republic_of_Germany
Germany-related_lists
Knight_Commanders_of_the_Order_of_Merit_of_the_Federal_Republic_of_Germany
Grand_Crosses_with_Star_and_Sash_of_the_Order_of_Merit_of_the_Federal_Republic_of_Germany
German_Roman_Catholics
German_politicians
Social_Democratic_Party_of_Germany_politicians
Members_of_the_Bundestag
German_women_in_politics
German_Protestants
Grand_Crosses_of_the_Order_of_Merit_of_the_Federal_Republic_of_Germany
Christian_Democratic_Union_(Germany)_politicians
People_from_Bremen
People_from_the_Province_of_Brandenburg
People_from_Berlin
People_from_the_Province_of_Saxony
People_from_the_Kingdom_of_Wrttemberg
People_from_the_Province_of_Pomerania
People_from_the_Province_of_Posen
German_diplomats
People_from_the_Rhine_Province
People_from_the_Province_of_Westphalia
Recipients_of_the_Cross_of_the_Order_of_Merit_of_the_Federal_Republic_of_Germany
People_from_Mannheim
German_lawyers
Defunct_liberal_political_parties
Members_of_the_Reichstag_of_the_German_Empire
German_physicians
Municipalities_in_Rhineland-Palatinate
Verbandsgemeinde_in_Rhineland-Palatinate
Landmarks_in_Germany
Autobahns_in_Germany
German_dialects
Municipalities_in_Lower_Saxony
Samtgemeinden_in_Lower_Saxony
Botanical_gardens_in_Germany
Towns_in_North_Rhine-Westphalia
Christian_monasteries_established_in_the_11th_century
Communes_of_Haut-Rhin
Communes_of_Bas-Rhin
Christian_monasteries_established_in_the_12th_century
Medieval_child_rulers
Holy_Roman_Empire
States_of_the_Holy_Roman_Empire
Communes_of_Moselle
Cities_and_towns_in_Apulia
[truncated: 15,364 more rows]
