# Supplementary material
Source: ML conference proceedings conference paper supplement (https://proceedings.neurips.cc/paper_files/paper/2022/hash/64587794695be22545d91c838243fcf8-Abstract.html)
Supplement: Supplementary file 1 [file 64587794695be22545d91c838243fcf8-Supplemental-Conference.zip › SUPPLEMENTARY/src/relational_erm/rerm_model/contagion_estimation.py]

import warnings

warnings.simplefilter(action='ignore', category=FutureWarning)

import pandas as pd
import statsmodels.api as sm


def ate_from_rerm_csv(csv_path):
    output = pd.read_csv(csv_path, '\t')
    y = output['y']
    X = output['v']
    X = sm.add_constant(X)
    model1 = sm.OLS(y, X).fit()
    unadjusted_ate = model1.params['v']  # reg.coef_
    unadjusted_ate_std = model1.bse['v']
    return unadjusted_ate, unadjusted_ate_std  # reg.bse #unadjusted_ate_std


def ate_binary_from_rerm_csv(csv_path):
    output = pd.read_csv(csv_path, '\t')
    y = output['y']
    v = output['v']
    y = list(y)
    v = list(v)
    log_reg = sm.Logit(y, v).fit()
    unadjusted_ate = log_reg.params[0]
    unadjusted_ate_std = log_reg.bse[0]

    return unadjusted_ate, unadjusted_ate_std


def main():
    ## Results for Experiment Section 6.1 - Continuous outcome
    print('Confounder = region, beta0 = 1, beta1 = 0.25')
    results1 = ate_from_rerm_csv('outcome_beta1_1_cov_registration_seed_50.csv')
    print(results1)

    # print('Confounder = age, beta0 = 1, beta1 = 0.5')
    # results4 = ate_from_rerm_csv('outcome_beta1_0.5_cov_age_seed_50.csv')
    # print(results4)
    #
    # print('Confounder = registration, beta0 = 1, beta1 = 0.5')
    # results7 = ate_from_rerm_csv('outcome_beta1_0.5_cov_registration_seed_50.csv')
    # print(results7)


    # ### Results for Experiment Section 6.2 - Binary outcome
    # print('Confounder = region')
    # results1 = ate_binary_from_rerm_csv('CLUSTER_RESULTS/binary_outcome_covariate_region_seed_10.csv')
    # print(results1)
    #
    # print('Confounder = age')
    # results2 = ate_binary_from_rerm_csv('CLUSTER_RESULTS/binary_outcome_covariate_age_seed_10.csv')
    # print(results2)
    #
    # print('Confounder = registration')
    # results3 = ate_binary_from_rerm_csv('CLUSTER_RESULTS/binary_outcome_covariate_registration_seed_10.csv')
    # print(results3)


if __name__ == "__main__":
    main()
