# Supplementary material
Source: ML conference proceedings conference paper supplement (https://proceedings.neurips.cc/paper_files/paper/2022/hash/64587794695be22545d91c838243fcf8-Abstract.html)
Supplement: Supplementary file 1 [file 64587794695be22545d91c838243fcf8-Supplemental-Conference.zip › SUPPLEMENTARY/src/relational_erm/tensorflow_ops/__init__.py]

from .dataset_ops import BiasedRandomWalkDataset, PSamplingDataset, UniformEdgeDataset
from relational_erm.tensorflow_ops.adapter_ops import adjacency_to_edge_list, adjacency_to_posneg_edge_list

__all__ = ['BiasedRandomWalkDataset', 'PSamplingDataset', 'UniformEdgeDataset']
