# Supplementary material
Source: ML conference proceedings conference paper supplement (https://proceedings.neurips.cc/paper_files/paper/2022/hash/64587794695be22545d91c838243fcf8-Abstract.html)
Supplement: Supplementary file 1 [file 64587794695be22545d91c838243fcf8-Supplemental-Conference.zip › SUPPLEMENTARY/src/requirements.txt]

absl-py==0.15.0
astunparse==1.6.3
cachetools==4.2.4
certifi==2021.10.8
charset-normalizer==2.0.7
gast==0.3.3
google-auth==2.3.2
google-auth-oauthlib==0.4.6
google-pasta==0.2.0
grpcio==1.41.1
h5py==2.10.0
idna==3.3
importlib-metadata==4.8.1
Keras-Preprocessing==1.1.2
Markdown==3.3.4
numpy==1.18.5
oauthlib==3.1.1
opt-einsum==3.3.0
protobuf==3.19.0
pyasn1==0.4.8
pyasn1-modules==0.2.8
requests==2.26.0
requests-oauthlib==1.3.0
rsa==4.7.2
scipy==1.4.1
six==1.16.0
tensorboard==2.7.0
tensorboard-data-server==0.6.1
tensorboard-plugin-wit==1.8.0
tensorflow==2.3.0
tensorflow-estimator==2.3.0
termcolor==1.1.0
typing-extensions==3.10.0.2
urllib3==1.26.7
Werkzeug==2.0.2
wrapt==1.13.2
zipp==3.6.0

pytest~=6.2.5
setuptools~=58.0.4
pandas~=1.3.4
mkl_random~=1.2.2
matplotlib~=3.5.0
statsmodels~=0.13.0
scikit-learn~=1.0.2
networkx~=2.6.3
